# Supplementary material for: Effects of Post-Translational Modifications of Fibrinogen on Clot Formation, Clot Structure, and Fibrinolysis: A Systematic Review
Source: PubMed Central journal article supplement — Arterioscler Thromb Vasc Biol. 2020 Jan 9;40(3):554–69. doi: 10.1161/ATVBAHA.119.313626 (PMC7043730; doi:10.1161/atvbaha.119.313626), 2020-01-09
Supplement: atv-40-554-s002.pdf [file atv-40-554-s002.pdf]

## **SUPPLEMENTAL MATERIAL**

### **The effects of post-translational modifications of fibrinogen on clot formation, clot structure and fibrinolysis – a systematic review**

Judith J. de Vries<sup>1</sup>, Charlotte J.M. Snoek<sup>1</sup>, Dingeman C. Rijken<sup>1</sup>, Moniek P.M. de Maat<sup>1</sup>

<sup>1</sup>Department of Hematology, Erasmus MC, University Medical Center Rotterdam, Rotterdam, The Netherlands

**Supplemental Methods: Literature search**  
**Supplemental Tables I-VII**  
**Supplemental References**

## Supplemental Methods: Literature search

### Embase.com

('protein processing'/de OR 'post-translationally modified protein'/de OR 'adenosine diphosphate ribosylation'/exp OR 'citrullination'/de OR 'deubiquitination'/de OR 'neddylation'/de OR 'protein acetylation'/de OR 'protein carbonylation'/de OR 'protein dephosphorylation'/de OR 'protein glycosylation'/de OR 'protein methylation'/de OR 'protein phosphorylation'/de OR 'protein prenylation'/de OR 'sumoylation'/de OR 'ubiquitination'/de OR 'acylation'/exp OR 'adenylation'/de OR 'ammonification'/de OR 'glucuronidation'/de OR 'glycosylation and deglycosylation'/de OR 'hydroxylation'/de OR 'methylation'/de OR 'nitration'/de OR 'phosphorylation and dephosphorylation'/exp OR 'sulfation'/de OR 'carboxylation and decarboxylation'/exp OR (((post-translational\* OR posttranslational\*) NEAR/3 (modification\* OR modified OR modify)) OR ((protein\*) NEAR/6 (processing)) OR ((fibrinogen\*) NEAR/6 (acetylation\* OR carbonylation\* OR dephosphorylation\* OR phosphorylation\* OR prenylation\* OR ribosylation\* OR citrullination\* OR deubiquitination\* OR neddylation\* OR sumoylation\* OR ubiquitination\* OR oxidation\* OR oxydation\* OR acylation\* OR Acetylation\* OR biotinylation\* OR carbamoylation\* OR carbamylation\* OR formylation\* OR Friedel-Crafts-reaction\* OR lipoylation\* OR glycation\* OR myristylation\* OR palmitoylation\* OR adenylation\* OR ammonification\* OR glucuronidation\* OR glycosylation\* OR hydroxylation\* OR methylation\* OR nitration\* OR sulfation\* OR homocysteinylation\* OR acetylated\* OR carbonylated\* OR dephosphorylated\* OR phosphorylated\* OR prenylated\* OR ribosylated\* OR citrullinated\* OR deubiquitinated\* OR neddylated\* OR sumoylated\* OR ubiquitinated\* OR oxidated\* OR oxydated\* OR acylated\* OR Acetylated\* OR biotinylated\* OR carbamoylated\* OR carbamylated\* OR formylated\* OR Friedel-Crafts-reaction\* OR lipoylated\* OR myristylated\* OR palmitoylated\* OR adenylylated\* OR ammonificated\* OR glucuronidated\* OR glycosylated\* OR hydroxylated\* OR methylated\* OR nitrated\* OR sulfated\* OR homocysteinylylated\* OR glycated\* OR carboxylation\* OR decarboxylation\* OR carboxylated\* OR decarboxylated\* OR lipidation\* OR lipidated\*)):ab,ti)

AND

('fibrinogen'/de OR 'fibrinogen variant'/de OR 'fibrinogen plus thrombin'/de OR (fibrinogen\* OR ((clot\*) NEAR/3 (factor-i OR factor-1)) OR clottagen\*):ab,ti)

AND

('blood clotting'/exp OR 'fibrin metabolism'/exp OR 'viscoelasticity'/de OR 'polymerization'/de OR (coagulat\* OR ((blood OR fibrin\* OR hemostatic OR haemostatic) NEAR/6 (clot\*)) OR fibrin-deposition\* OR ((fibrin) NEAR/3 (format\* OR polymerization\* OR polymerisation\*)) OR fibrinolys\* OR blood-clot-lys\* OR fibrinogenolys\* OR ((plasminogen\*) NEAR/3 (activ\*)) OR ((fibrin) NEAR/6 (network\* OR stabilit\* OR stable OR structure\*)) OR ((fibrinogen\*) NEAR/6 (behavior\* OR behaviour\* OR function\*)) OR ((clot\*) NEAR/3 (permeab\* OR densit\* OR stiffness\*)) OR ((fiber\* OR fibre\* OR fibrin\*) NEAR/6 (thickness))):ab,ti)

### Medline (Ovid)

(Protein Processing, Post-Translational/ OR Protein Modification, Translational/ OR exp ADP-Ribosylation/ OR Citrullination/ OR Ubiquitination/ OR Protein Carbamylation/ OR

Protein Carbonylation/ OR Phosphorylation/ OR Glycosylation/ OR Methylation/ OR Protein Prenylation/ OR Acylation/ OR Hydroxylation/ OR (((post-translational\* OR posttranslational\*) ADJ3 (modification\* OR modified OR modify)) OR ((protein\*) ADJ6 (processing)) OR ((fibrinogen\*) ADJ6 (acetylation\* OR carbonylation\* OR dephosphorylation\* OR phosphorylation\* OR prenylation\* OR ribosylation\* OR citrullination\* OR deubiquitination\* OR neddylation\* OR sumoylation\* OR ubiquitination\* OR oxidation\* OR oxydation\* OR acylation\* OR Acetylation\* OR biotinylation\* OR carbamoylation\* OR carbamylation\* OR formylation\* OR Friedel-Crafts-reaction\* OR lipoylation\* OR glycation\* OR myristylation\* OR palmitoylation\* OR adenylation\* OR ammonification\* OR glucuronidation\* OR glycosylation\* OR hydroxylation\* OR methylation\* OR nitration\* OR sulfation\* OR homocysteinylation\* OR acetylated\* OR carbonylated\* OR dephosphorylated\* OR phosphorylated\* OR prenylated\* OR ribosylated\* OR citrullinated\* OR deubiquitinated\* OR neddylated\* OR sumoylated\* OR ubiquitinated\* OR oxidated\* OR oxydated\* OR acylated\* OR Acetylated\* OR biotinylated\* OR carbamoylated\* OR carbamylated\* OR formylated\* OR Friedel-Crafts-reaction\* OR lipoylated\* OR myristylated\* OR palmitoylated\* OR adenylated\* OR ammonificated\* OR glucuronidated\* OR glycosylated\* OR hydroxylated\* OR methylated\* OR nitrated\* OR sulfated\* OR homocysteinylated\* OR glycated\* OR carboxylation\* OR decarboxylation\* OR carboxylated\* OR decarboxylated\* OR lipidation\* OR lipidated\*))).ab,ti.)

AND

(exp Fibrinogen/ OR (fibrinogen\* OR ((clot\*) ADJ3 (factor-i OR factor-1)) OR clottagen\*).ab,ti.)

AND

(exp Blood Coagulation/ OR Polymerization/ OR exp Fibrin/ OR (coagulat\* OR ((blood OR fibrin\* OR hemostatic OR haemostatic) ADJ6 (clot\*)) OR fibrin-deposition\* OR ((fibrin) ADJ3 (format\* OR polymerization\* OR polymerisation\*)) OR fibrinolys\* OR blood-clot-lys\* OR fibrinogenolys\* OR ((plasminogen\*) ADJ3 (activ\*)) OR ((fibrin) ADJ6 (network\* OR stabilit\* OR stable OR structure\*)) OR ((fibrinogen\*) ADJ6 (behavior\* OR behaviour\* OR function\*)) OR ((clot\*) ADJ3 (permeab\* OR densit\* OR stiffness\*)) OR ((fiber\* OR fibre\* OR fibrin\*) ADJ6 (thickness))).ab,ti.)

### **Web of Science**

TS=((((post-translational\* OR posttranslational\*) NEAR/2 (modification\* OR modified OR modify)) OR ((protein\*) NEAR/5 (processing)) OR ((fibrinogen\*) NEAR/5 (acetylation\* OR carbonylation\* OR dephosphorylation\* OR phosphorylation\* OR prenylation\* OR ribosylation\* OR citrullination\* OR deubiquitination\* OR neddylation\* OR sumoylation\* OR ubiquitination\* OR oxidation\* OR oxydation\* OR acylation\* OR Acetylation\* OR biotinylation\* OR carbamoylation\* OR carbamylation\* OR formylation\* OR Friedel-Crafts-reaction\* OR lipoylation\* OR glycation\* OR myristylation\* OR palmitoylation\* OR adenylation\* OR ammonification\* OR glucuronidation\* OR glycosylation\* OR hydroxylation\* OR methylation\* OR nitration\* OR sulfation\* OR homocysteinylation\* OR acetylated\* OR carbonylated\* OR dephosphorylated\* OR phosphorylated\* OR prenylated\* OR ribosylated\* OR citrullinated\* OR deubiquitinated\* OR neddylated\* OR sumoylated\* OR ubiquitinated\* OR oxidated\* OR oxydated\* OR acylated\* OR Acetylated\* OR biotinylated\* OR carbamoylated\* OR carbamylated\* OR

formylated\* OR Friedel-Crafts-reaction\* OR lipoylated\* OR myristylated\* OR palmitoylated\* OR adenylated\* OR ammonificated\* OR glucuronidated\* OR glycosylated\* OR hydroxylated\* OR methylated\* OR nitrated\* OR sulfated\* OR homocysteinylation\* OR glycation\* OR carboxylation\* OR decarboxylation\* OR carboxylated\* OR decarboxylated\* OR lipidation\* OR lipidated\*))))

AND

((fibrinogen\* OR ((clot\*) NEAR/2 (factor-i OR factor-1)) OR clottagen\*))

AND

((coagulat\* OR ((blood OR fibrin\* OR hemostatic OR haemostatic) NEAR/5 (clot\*)) OR fibrin-deposition\* OR ((fibrin) NEAR/2 (format\* OR polymerization\* OR polymerisation\*)) OR fibrinolys\* OR blood-clot-lys\* OR fibrinogenolys\* OR ((plasminogen\*) NEAR/2 (activ\*)) OR ((fibrin) NEAR/5 (network\* OR stabilit\* OR stable OR structure\*)) OR ((fibrinogen\*) NEAR/5 (behavior\* OR behaviour\* OR function\*)) OR ((clot\*) NEAR/2 (permeab\* OR densit\* OR stiffness\*)) OR ((fiber\* OR fibre\* OR fibrin\*) NEAR/5 (thickness))))))

### **Cochrane Central Register of Controlled Trials**

(((((post-translational\* OR posttranslational\*) NEAR/3 (modification\* OR modified OR modify)) OR ((protein\*) NEAR/6 (processing)) OR ((fibrinogen\*) NEAR/6 (acetylation\* OR carbonylation\* OR dephosphorylation\* OR phosphorylation\* OR prenylation\* OR ribosylation\* OR citrullination\* OR deubiquitination\* OR neddylation\* OR sumoylation\* OR ubiquitination\* OR oxidation\* OR oxydation\* OR acylation\* OR Acetylation\* OR biotinylation\* OR carbamoylation\* OR carbamylation\* OR formylation\* OR Friedel-Crafts-reaction\* OR lipoylation\* OR glycation\* OR myristylation\* OR palmitoylation\* OR adenylation\* OR ammonification\* OR glucuronidation\* OR glycosylation\* OR hydroxylation\* OR methylation\* OR nitration\* OR sulfation\* OR homocysteinylation\* OR acetylated\* OR carbonylated\* OR dephosphorylated\* OR phosphorylated\* OR prenylated\* OR ribosylated\* OR citrullinated\* OR deubiquitinated\* OR neddylated\* OR sumoylated\* OR ubiquitinated\* OR oxidated\* OR oxydated\* OR acylated\* OR Acetylated\* OR biotinylated\* OR carbamoylated\* OR carbamylated\* OR formylated\* OR Friedel-Crafts-reaction\* OR lipoylated\* OR myristylated\* OR palmitoylated\* OR adenylated\* OR ammonificated\* OR glucuronidated\* OR glycosylated\* OR hydroxylated\* OR methylated\* OR nitrated\* OR sulfated\* OR homocysteinylation\* OR glycation\* OR carboxylation\* OR decarboxylation\* OR carboxylated\* OR decarboxylated\* OR lipidation\* OR lipidated\*)))):ab,ti) AND ((fibrinogen\* OR ((clot\*) NEAR/3 (factor-i OR factor-1)) OR clottagen\*):ab,ti) AND ((coagulat\* OR ((blood OR fibrin\* OR hemostatic OR haemostatic) NEAR/6 (clot\*)) OR fibrin-deposition\* OR ((fibrin) NEAR/3 (format\* OR polymerization\* OR polymerisation\*)) OR fibrinolys\* OR blood-clot-lys\* OR fibrinogenolys\* OR ((plasminogen\*) NEAR/3 (activ\*)) OR ((fibrin) NEAR/6 (network\* OR stabilit\* OR stable OR structure\*)) OR ((fibrinogen\*) NEAR/6 (behavior\* OR behaviour\* OR function\*)) OR ((clot\*) NEAR/3 (permeab\* OR densit\* OR stiffness\*)) OR ((fiber\* OR fibre\* OR fibrin\*) NEAR/6 (thickness))):ab,ti)

**Supplemental Table I. Effects of oxidation of fibrinogen**

| Author                                      | Method                                                                             | Clottability | Cleavage by thrombin | Rate of polymerization | Initiation of polymerization | Maximum turbidity | Diameter of fibers | Stiffness of clot | Permeability | Density | Cross-linking | Plasmin digestion of fibrinogen | Clot lysis |
|---------------------------------------------|------------------------------------------------------------------------------------|--------------|----------------------|------------------------|------------------------------|-------------------|--------------------|-------------------|--------------|---------|---------------|---------------------------------|------------|
| <b>Palos et al. (1949)</b> <sup>1</sup>     | Fibrinogen + molecular oxygen                                                      |              |                      | =                      |                              |                   |                    |                   |              |         |               |                                 |            |
| <b>Sizer et al. (1951)</b> <sup>2</sup>     | Bovine fibrinogen + tyrosinase                                                     | ↓            |                      | ↓                      |                              |                   | ↓                  |                   |              |         |               |                                 |            |
| <b>Krugelis et al. (1954)</b> <sup>3</sup>  | Fibrinogen or plasma + tyrosinase                                                  |              |                      | ↓                      |                              |                   |                    |                   |              |         |               |                                 |            |
| <b>Zieve et al. (1966)</b> <sup>4</sup>     | Irradiation of fibrinogen                                                          |              |                      | ↓                      |                              |                   |                    |                   |              |         |               |                                 |            |
| <b>Inada et al. (1978)</b> <sup>5</sup>     | Photooxidation of fibrinogen                                                       | ↓            | =                    | ↓                      |                              | ↓                 |                    |                   |              |         |               |                                 |            |
| <b>Ishida et al. (1978)</b> <sup>6</sup>    | Fibrinogen + 0-150 mM H <sub>2</sub> O <sub>2</sub>                                |              |                      | ↓                      |                              | ↓                 |                    |                   |              |         |               |                                 |            |
| <b>Shacter et al. (1995)</b> <sup>7</sup>   | Fibrinogen + 25 mM ascorbate + 100 μM FeCl <sub>3</sub>                            |              | ↓                    | ↓                      |                              | ↓                 |                    |                   |              |         |               |                                 |            |
|                                             | γ-irradiation of fibrinogen                                                        |              | =                    | ↓                      |                              |                   |                    |                   |              |         |               |                                 |            |
| <b>Upchurch et al. (1998)</b> <sup>8</sup>  | Fibrinogen + 25 mM ascorbate + 100 μM FeCl <sub>3</sub>                            |              |                      | ↑                      |                              |                   |                    |                   |              |         |               |                                 |            |
| <b>Lupidi et al. (1999)</b> <sup>9</sup>    | Fibrinogen + 0-80 μM peroxyntirite                                                 |              | =                    | ↓                      |                              |                   |                    |                   |              |         |               |                                 |            |
| <b>Roitman et al. (2004)</b> <sup>10</sup>  | UV-irradiation of fibrinogen                                                       |              |                      | ↓                      |                              |                   |                    | ↓                 |              | ↓       |               |                                 | =          |
| <b>Vadseth et al. (2004)</b> <sup>11</sup>  | Fibrinogen + 60 nM MPO + 100 μM H <sub>2</sub> O <sub>2</sub>                      |              |                      |                        |                              |                   |                    | ↓                 | ↓            |         |               |                                 |            |
| <b>Nowak et al. (2007)</b> <sup>12</sup>    | Fibrinogen + 10 μM peroxyntirite                                                   |              |                      | =                      | =                            | =                 |                    |                   |              |         |               | =                               |            |
|                                             | Fibrinogen + 100 or 1000 μM peroxyntirite                                          |              |                      | ↓                      | ↓                            | ↓                 |                    |                   |              |         |               | ↓                               |            |
| <b>Andrades et al. (2009)</b> <sup>13</sup> | Bovine fibrinogen or human plasma + 1 mM glycolaldehyde                            |              |                      | ↓                      | ↓                            | ↓                 | ↓                  |                   |              |         |               |                                 | ↓          |
| <b>Azizova et al. (2009)</b> <sup>14</sup>  | Fibrinogen + 50-500 μM FeSO <sub>4</sub> + 10-250 μM H <sub>2</sub> O <sub>2</sub> |              |                      | ↓                      |                              |                   |                    |                   |              |         |               |                                 |            |
| <b>Piryazev et al. (2009)</b> <sup>15</sup> | Fibrinogen + 50-500 μM FeSO <sub>4</sub> · H <sub>2</sub> O <sub>2</sub>           |              |                      | ↓                      |                              | ↓                 |                    |                   |              |         |               |                                 | =          |

|                                                |                                                                                             |  |   |    |    |      |   |   |   |   |   |  |   |
|------------------------------------------------|---------------------------------------------------------------------------------------------|--|---|----|----|------|---|---|---|---|---|--|---|
| <b>Rosenfeld et al. (2009)</b> <sup>16</sup>   | Fibrinogen + 200-600 nmol ozone                                                             |  |   | ↓  | ↑  |      | ↑ |   |   |   |   |  |   |
| <b>Tetik et al. (2011)</b> <sup>17</sup>       | Fibrinogen + 100 μM Fe <sup>3+</sup> /ascorbate                                             |  |   | ↓  | ↓  |      |   | ↓ |   |   |   |  | ↓ |
| <b>Weigand et al. (2012)</b> <sup>18</sup>     | Fibrinogen + 50 or 150 μmol HOCl/g fibrinogen                                               |  |   | =  |    | ↓    | ↓ | ↓ | ↓ | ↑ | = |  | ↓ |
| <b>Xu et al. (2012)</b> <sup>19</sup>          | Bovine fibrinogen + 9 mM reactive carbonyl compounds                                        |  | ↓ | ↓  |    | (ns) |   |   |   |   |   |  |   |
| <b>Rosenfeld et al. (2013)</b> <sup>20</sup>   | Fibrinogen + 300 nmol ozone                                                                 |  |   | ↓  |    |      | ↑ |   |   |   |   |  |   |
| <b>Stikarova et al. (2013)</b> <sup>21</sup>   | Fibrinogen + 10 mM MDA                                                                      |  |   |    |    | (ns) | ↓ |   |   | ↑ |   |  |   |
|                                                | Fibrinogen + 1.25 mM NaOCl                                                                  |  |   | ↓  |    | ↓    | ↓ |   | ↑ |   |   |  |   |
|                                                | Fibrinogen + 100 μM SIN-1                                                                   |  |   |    |    | (ns) | ↓ |   |   | ↑ |   |  |   |
| <b>Becatti et al. (2014)</b> <sup>22</sup>     | Fibrinogen + 0.01-1 mM AAPH                                                                 |  |   | ↓  | ↓  | ↓    |   |   |   |   |   |  | ↓ |
| <b>Rosenfeld et al. (2014)</b> <sup>23</sup>   | Fibrinogen + 50-200 nmol ozone                                                              |  |   |    |    |      |   |   |   | ↑ |   |  |   |
| <b>Torbitz et al. (2015)</b> <sup>24</sup>     | Fibrinogen + 1, 2 or 4 mM HOCl                                                              |  |   | ↑  |    |      |   |   |   |   |   |  |   |
| <b>Harutyunyan et al. (2017)</b> <sup>25</sup> | Rat plasma + 0.05-0.2 (L) or 0.2-0.8 (H) mM Fe <sup>2+</sup> /H <sub>2</sub> O <sub>2</sub> |  |   | L= | H↑ |      |   |   |   |   |   |  |   |
| <b>Wang et al. (2018)</b> <sup>26</sup>        | Fibrinogen + 0.5 mM H <sub>2</sub> O <sub>2</sub> + 3 mg/ml Fe <sub>3</sub> O <sub>4</sub>  |  |   | ↓  |    |      | ↓ | ↓ | ↑ | ↑ |   |  |   |
| <b>Yurina et al. (2019)</b> <sup>27</sup>      | Fibrinogen + 50, 500 or 1500 μmol HOCl/mg fibrinogen                                        |  |   | ↓  |    | ↓    |   |   |   |   |   |  |   |
| <b>Paton et al. (2010)</b> <sup>28</sup>       | Fibrinogen from MI patients                                                                 |  |   | ↑  | =  | ↑    | ↑ |   |   | ↓ |   |  |   |
| <b>Becatti et al. (2014)</b> <sup>22</sup>     | Fibrinogen from MI patients                                                                 |  |   | ↓  | ↓  | ↓    | ↓ |   |   |   |   |  | ↓ |
| <b>Becatti et al. (2016)</b> <sup>29</sup>     | Fibrinogen from patients with Behçet disease                                                |  |   | ↓  | ↓  | ↓    |   |   |   |   |   |  | ↓ |
| <b>Hugenholtz et al. (2016)</b> <sup>30</sup>  | Fibrinogen from cirrhosis patients                                                          |  |   | =  |    | =    |   |   | ↓ | = |   |  |   |
|                                                | Plasma from cirrhosis patients                                                              |  |   | ↓  |    | =    | = |   | ↓ | = |   |  |   |
| <b>White et al. (2016)</b> <sup>31</sup>       | Plasma from trauma patients                                                                 |  |   | ↓  |    |      |   | ↓ |   |   |   |  | ↑ |

Abbreviations: AAPH, 2'-azobis(2-amidinopropane) dihydrochloride; Fe<sup>2+</sup>, ferrous ion; Fe<sup>3+</sup>, ferric ion; FeCl<sub>3</sub>, iron(III)chloride; Fe<sub>3</sub>O<sub>4</sub>, iron(II),(III)oxide; FeSO<sub>4</sub>, iron(II)sulfate; H<sub>2</sub>O<sub>2</sub>, hydrogen peroxide; HOCl, hypochlorous acid; MDA, malondialdehyde; MI, myocardial infarction; MPO, myeloperoxidase; NaOCl, sodium hypochlorite; SIN-1, 3-morpholinonydnonimine (forms peroxynitrite).

**Supplemental Table II.** Effects of nitration of fibrinogen

| Author                                         | Method                                                   | Clottability | Cleavage by thrombin | Rate of polymerization | Initiation of polymerization | Maximum turbidity | Diameter of fibers | Stiffness of clot | Permeability | Density | Cross-linking | Plasmin digestion of fibrinogen | Clot lysis |
|------------------------------------------------|----------------------------------------------------------|--------------|----------------------|------------------------|------------------------------|-------------------|--------------------|-------------------|--------------|---------|---------------|---------------------------------|------------|
| <b>Bijak et al (2012)</b> <sup>32</sup>        | Fibrinogen + 1 μM peroxynitrite                          |              |                      | ↑                      |                              | ↑                 |                    |                   |              |         |               |                                 |            |
| <b>Nowak et al (2007)</b> <sup>12</sup>        | Fibrinogen + 10 μM peroxynitrite                         |              |                      | =                      | =                            | =                 |                    |                   |              |         |               | =                               |            |
| <b>Ding et al (2014)</b> <sup>33</sup>         | Bovine fibrinogen + 8.7 μM peroxynitrite + manganese     |              |                      | ↓                      |                              |                   |                    |                   |              |         |               |                                 |            |
| <b>Bijak et al (2012)</b> <sup>32</sup>        | Fibrinogen + 10 or higher μM peroxynitrite               |              |                      | ↓                      |                              | ↓                 | ↓                  |                   |              | ↑       |               |                                 |            |
| <b>Lupidi et al. (1999)</b> <sup>9</sup>       | Fibrinogen + 0-80 μM peroxynitrite                       |              | =                    | ↓                      |                              |                   |                    |                   |              |         |               |                                 |            |
| <b>Vadseth et al. (2004)</b> <sup>11</sup>     | Fibrinogen + 100 μM nitrite                              |              |                      |                        | ↑                            | ↑                 |                    |                   |              |         |               |                                 |            |
| <b>Nowak et al (2007)</b> <sup>12</sup>        | Fibrinogen + 100 or 1000 μM peroxynitrite                |              |                      | ↓                      | ↓                            | ↓                 |                    |                   |              |         |               | ↓                               |            |
| <b>Bijak et al (2013)</b> <sup>34</sup>        | Fibrinogen + 100 μM peroxynitrite                        |              |                      | ↓                      |                              | ↓                 |                    |                   |              |         |               |                                 |            |
| <b>Gole et al. (2000)</b> <sup>35</sup>        | Fibrinogen + 1 mM peroxynitrite                          |              |                      | ↑                      |                              |                   |                    |                   |              |         |               |                                 |            |
| <b>Helms et al (2017)</b> <sup>36</sup>        | Fibrinogen + 5 μM ProliNONOate                           |              |                      | ↓ (ns)                 |                              |                   | ↑                  | =                 |              | ↓       |               |                                 |            |
| <b>Ponzcek et al (2008)</b> <sup>37</sup>      | Fibrinogen + 10 μM NO <sub>2</sub> BF <sub>4</sub>       |              |                      | ↑                      | ↑                            | ↑                 |                    |                   |              |         |               |                                 |            |
| <b>Ponzcek et al (2008)</b> <sup>37</sup>      | Fibrinogen + 0.1 or 1 mM NO <sub>2</sub> BF <sub>4</sub> |              |                      | ↓                      | ↓                            | ↓                 |                    |                   |              |         |               |                                 |            |
| <b>Vadseth et al (2004)</b> <sup>11</sup>      | Fibrinogen from CAD patients                             |              | =                    | ↑                      | ↑                            | ↑                 | ↓                  | ↓                 | ↑            |         | ↑             | =                               | =          |
| <b>Parastatidis et al (2007)</b> <sup>38</sup> | Depletion of nitrated fibrinogen from                    |              |                      | ↑                      |                              | ↑                 |                    |                   |              |         |               |                                 |            |

|                                                |                                              |  |  |   |  |   |   |   |  |  |  |  |  |   |
|------------------------------------------------|----------------------------------------------|--|--|---|--|---|---|---|--|--|--|--|--|---|
|                                                | CAD patients (only 3)                        |  |  |   |  |   |   |   |  |  |  |  |  |   |
| <b>Parastatidis et al (2008)</b> <sup>39</sup> | Fibrinogen from smokers                      |  |  | ↑ |  | ↑ | = | ↑ |  |  |  |  |  | ↓ |
|                                                | Depletion of nitrated fibrinogen             |  |  | ↑ |  |   |   |   |  |  |  |  |  |   |
| <b>Heffron et al (2009)</b> <sup>40</sup>      | Plasma from volunteers receiving 1 ng/kg LPS |  |  | ↑ |  | = |   |   |  |  |  |  |  |   |

Abbreviations: CAD, coronary artery disease; LPS, lipopolysaccharide.

**Supplemental Table III. Effects of glycosylation of fibrinogen**

| Author                                                              | Method                                      | Clottability | Cleavage by thrombin | Rate of polymerization | Initiation of polymerization | Maximum turbidity | Diameter of fibers | Stiffness of clot | Permeability | Density | Cross-linking | Plasmin digestion of fibrinogen | Clot lysis |
|---------------------------------------------------------------------|---------------------------------------------|--------------|----------------------|------------------------|------------------------------|-------------------|--------------------|-------------------|--------------|---------|---------------|---------------------------------|------------|
| <b>Glycosylation</b>                                                |                                             |              |                      |                        |                              |                   |                    |                   |              |         |               |                                 |            |
| <b>Gligorijevic et al (2018)</b> <sup>41</sup>                      | Fibrinogen from aging people                |              |                      | =                      |                              | =                 | =                  |                   | =            |         |               |                                 |            |
| <b>Deglycosylation</b>                                              |                                             |              |                      |                        |                              |                   |                    |                   |              |         |               |                                 |            |
| <b>Gilman et al (1984)</b> <sup>42</sup>                            | Rabbit hepatocytes + tunicamycin            |              |                      | =                      |                              |                   |                    |                   |              |         |               |                                 |            |
| <b>Langer et al (1988)</b> <sup>43</sup>                            | Fibrinogen + PNG-Asn amidase                |              | =                    | ↑                      |                              | ↑                 | ↑                  |                   | ↑            |         | =             | =                               |            |
| <b>Sialylation (increased sialic acid level compared to normal)</b> |                                             |              |                      |                        |                              |                   |                    |                   |              |         |               |                                 |            |
| <b>Gralnick et al (1978)</b> <sup>44</sup>                          | Fibrinogen from patients with hepatoma      |              | =                    | ↓                      | ↓                            | =                 |                    |                   |              |         | =             | =                               | =          |
| <b>Martinez et al (1978)</b> <sup>45</sup>                          | Fibrinogen from patients with liver disease |              |                      | ↓                      |                              |                   |                    |                   |              |         |               |                                 |            |
| <b>Martinez et al (1983)</b> <sup>46</sup>                          | Fibrinogen from patients with liver disease |              |                      | ↓                      | ↓                            | ↓                 |                    |                   |              |         |               |                                 |            |
| <b>Maghzal et al (2005)</b> <sup>47</sup>                           | Fibrinogen from patients taking fibrates    |              |                      | ↓                      | ↓                            |                   |                    |                   |              |         |               |                                 |            |
| <b>Desialylation</b>                                                |                                             |              |                      |                        |                              |                   |                    |                   |              |         |               |                                 |            |
| <b>Chandrasekhar et al (1962)</b> <sup>48</sup>                     | Bovine fibrinogen + neuraminidase           |              |                      | ↑                      |                              |                   |                    |                   |              |         |               |                                 |            |
| <b>Laki et al (1962)</b> <sup>49</sup>                              | Bovine fibrinogen + periodate               | ↓            |                      |                        |                              |                   |                    |                   |              |         |               |                                 |            |



|                                                |                                                       |  |   |        |        |   |   |   |  |  |   |  |  |
|------------------------------------------------|-------------------------------------------------------|--|---|--------|--------|---|---|---|--|--|---|--|--|
| <b>Gentry et al (1976)</b> <sup>50</sup>       | Fibrinogen + neuraminidase                            |  |   | =      |        |   |   | = |  |  | = |  |  |
| <b>Martinez et al (1977)</b> <sup>51</sup>     | Fibrinogen + neuraminidase                            |  | = | ↑      | ↑      | ↑ |   |   |  |  | = |  |  |
| <b>Martinez et al (1978)</b> <sup>45</sup>     | Fibrinogen with increased sialic acid + neuraminidase |  |   | ↑      |        |   |   |   |  |  |   |  |  |
| <b>Diaz-Maurino et al (1981)</b> <sup>52</sup> | Fibrinogen + neuraminidase                            |  |   | ↑      |        |   |   |   |  |  |   |  |  |
| <b>Diaz-Maurino et al (1982)</b> <sup>53</sup> | Fibrinogen + neuraminidase                            |  |   | ↑      |        |   |   |   |  |  |   |  |  |
| <b>Martinez et al (1983)</b> <sup>46</sup>     | Fibrinogen with increased sialic acid + neuraminidase |  |   | ↑      |        |   |   |   |  |  |   |  |  |
| <b>Dang et al (1989)</b> <sup>54</sup>         | Fibrinogen + neuraminidase                            |  |   | ↑      |        | ↑ | ↑ |   |  |  |   |  |  |
| <b>Okude et al (1993)</b> <sup>55</sup>        | Fibrinogen + neuraminidase                            |  | = |        | =      | ↑ |   | ↓ |  |  | ↓ |  |  |
| <b>El-Fasakhany et al (2003)</b> <sup>56</sup> | Bovine fibrinogen + neuraminidase                     |  |   | ↑      |        |   |   |   |  |  |   |  |  |
| <b>Maghzal et al (2005)</b> <sup>47</sup>      | Fibrinogen from pregnant women                        |  |   | ↑ (ns) | ↑ (ns) |   |   |   |  |  |   |  |  |

Abbreviations: PNG-Asn amidase, peptide-N-(N-acetyl-β-glucosaminy)asparagine amidase.

**Supplemental Table IV. Effects of glycation of fibrinogen**

| Author                                   | Method                                             | Clottability | Cleavage by thrombin | Rate of polymerization | Initiation of polymerization | Maximum turbidity | Diameter of fibers | Stiffness of clot | Permeability | Density | Cross-linking | Plasmin digestion of fibrinogen | Clot lysis |
|------------------------------------------|----------------------------------------------------|--------------|----------------------|------------------------|------------------------------|-------------------|--------------------|-------------------|--------------|---------|---------------|---------------------------------|------------|
| <b>Norton et al (2017)</b> <sup>57</sup> | Fibrinogen + 5 or 10 mM glucose (90 or 180 mg/dL)  |              |                      |                        |                              |                   |                    |                   |              |         |               |                                 |            |
| <b>Hood et al (2018)</b> <sup>58</sup>   | Fibrinogen + 6 or 10 mM glucose (108 or 180 mg/dL) |              |                      |                        |                              |                   |                    |                   |              | ↑       |               |                                 |            |
| <b>Dunn et al (2005)</b> <sup>59</sup>   | Fibrinogen + 0-20 mM glucose (0-360 mg/dL)         |              | =                    |                        | ↓                            | ↓                 | =                  |                   | ↓            | ↑       | =             |                                 |            |
| <b>Ney et al (1985)</b> <sup>60</sup>    | Fibrinogen + 5 or 20 mM glucose (90 or 360 mg/dL)  |              | =                    | =                      |                              |                   |                    |                   |              |         | =             | ↓                               | =          |



|                                                |                                                           |   |   |   |   |   |   |   |   |   |   |  |   |
|------------------------------------------------|-----------------------------------------------------------|---|---|---|---|---|---|---|---|---|---|--|---|
| <b>Caspary et al (1956)</b> <sup>73</sup>      | Fibrinogen + NS-diacetylthioethan olamine                 |   | = | ↓ |   |   |   |   |   |   |   |  |   |
| <b>Philips et al (1973)</b> <sup>74</sup>      | Bovine fibrinogen + N-acetylimidazole                     | = |   | = |   |   |   | ↓ |   |   |   |  |   |
| <b>Wegrzynowicz et al (1975)</b> <sup>75</sup> | Bovine fibrinogen + acetic anhydride                      |   | = | ↓ |   |   |   |   |   |   |   |  |   |
| <b>Bjornsson et al (1989)</b> <sup>76</sup>    | Fibrinogen + acetic anhydride                             |   |   | ↓ |   |   |   |   |   |   |   |  | ↑ |
| <b>Upchurch et al (1998)</b> <sup>8</sup>      | Fibrinogen + 0.18 mg/ml aspirin                           |   |   | = |   |   |   |   |   |   |   |  |   |
| <b>He et al (2001)</b> <sup>77</sup>           | Fibrinogen + 0.16-12.96 mM aspirin (30-2330 mg/L)         |   |   | ↓ |   | ↓ |   |   |   |   | ↓ |  |   |
| <b>Ajjan et al (2009)</b> <sup>78</sup>        | Hamster fibrinogen + 1, 10 or 100 mg/L aspirin            |   |   |   | ↓ | ↑ | ↑ | ↓ | ↑ | ↓ |   |  | ↑ |
| <b>He et al (2009)</b> <sup>79</sup>           | Fibrinogen + 0.07 mM aspirin (13 mg/L)                    |   |   | = |   |   | ↑ |   | ↑ | ↓ |   |  | ↑ |
| <b>Bjornsson et al (1989)</b> <sup>76</sup>    | Plasma from volunteers taking 650 mg aspirin 2x/day       |   |   | ↑ |   | ↑ |   |   |   |   |   |  | ↑ |
| <b>Williams et al (1995)</b> <sup>80</sup>     | Plasma from patients with SAP taking 75 mg aspirin        |   |   | ↓ |   | ↓ | ↑ |   |   |   |   |  | ↑ |
| <b>Fatah et al (1996)</b> <sup>81</sup>        | Plasma from patients with SAP taking 75 or 160 mg aspirin |   |   |   |   |   |   | ↑ |   | ↓ |   |  |   |
| <b>Jörneskog et al (1998)</b> <sup>82</sup>    | Plasma from type 1 diabetics taking 75 mg aspirin         |   |   |   |   |   | ↑ |   | ↑ |   |   |  |   |
| <b>Williams et al (1998)</b> <sup>83</sup>     | Plasma from volunteers taking 75 mg aspirin               |   |   |   |   |   | ↑ |   | ↑ |   |   |  | = |
|                                                | Plasma from volunteers taking 320 mg aspirin              |   |   |   |   |   | = |   | ↑ |   |   |  |   |
| <b>Antovic et al (2005)</b> <sup>84</sup>      | Plasma from volunteers taking 37.5 mg aspirin             |   |   |   |   |   | ↑ |   | ↑ |   |   |  |   |
|                                                | Plasma from volunteers taking 320 or 640 mg aspirin       |   |   |   |   |   | = |   | ↑ |   |   |  |   |
| <b>Ajjan et al (2009)</b> <sup>78</sup>        | Fibrinogen from volunteers taking 150 mg aspirin          |   |   |   | = | ↑ | ↑ |   |   |   |   |  | ↑ |

Abbreviations: SAP, stable angina pectoris.

**Supplemental Table VI.** Effects of phosphorylation of fibrinogen

| Author                                     | Method                                      | Clottability | Cleavage by thrombin | Rate of polymerization | Initiation of polymerization | Maximum turbidity | Diameter of fibers | Stiffness of clot | Permeability | Density | Cross-linking | Plasmin digestion of fibrinogen | Clot lysis |
|--------------------------------------------|---------------------------------------------|--------------|----------------------|------------------------|------------------------------|-------------------|--------------------|-------------------|--------------|---------|---------------|---------------------------------|------------|
| <b>Phosphorylation</b>                     |                                             |              |                      |                        |                              |                   |                    |                   |              |         |               |                                 |            |
| <b>Hanna et al (1984)</b> <sup>85</sup>    | Fibrinogen separated in different fractions |              | ↑                    |                        |                              |                   |                    |                   |              |         |               |                                 |            |
| <b>Heldin et al (1987)</b> <sup>86</sup>   | Fibrinogen + protein kinase C               |              | =                    | =                      |                              |                   | ↓                  |                   |              |         | =             |                                 |            |
| <b>Forsberg et al (1989)</b> <sup>87</sup> | Fibrinogen + protein kinase C               |              |                      |                        |                              | ↓                 | ↓                  |                   |              |         |               |                                 |            |
| <b>Forsberg et al (1990)</b> <sup>88</sup> | Fibrinogen + protein kinase C               |              |                      |                        |                              |                   |                    |                   |              |         |               | ↓                               |            |
| <b>Martin et al (1991)</b> <sup>89</sup>   | Fibrinogen + protein kinase A               |              |                      |                        |                              | ↓                 | ↓                  |                   |              |         |               | ↓                               |            |
|                                            | Fibrinogen + protein kinase C               |              |                      |                        |                              | ↓                 | ↓                  |                   |              |         |               |                                 |            |
|                                            | Fibrinogen + casein kinase I                |              |                      |                        |                              | =                 | =                  |                   |              |         |               | ↓                               |            |
|                                            | Fibrinogen + casein kinase II               |              |                      |                        |                              | ↑                 | ↑                  |                   |              |         |               | ↓                               |            |
| <b>Heldin (1987)</b> <sup>90</sup>         | Fibrinogen + casein kinase II               |              |                      |                        |                              | ↑                 |                    |                   |              |         |               |                                 |            |
| <b>Suk et al (1997)</b> <sup>91</sup>      | Fibrinogen + casein kinase II               |              |                      | ↑                      |                              | ↑                 |                    |                   |              |         |               |                                 |            |
| <b>Martin et al (1992)</b> <sup>92</sup>   | Fibrinogen from patients after hip surgery  |              |                      |                        |                              | ↑                 | ↑                  |                   |              |         |               | ↓                               |            |
| <b>Dephosphorylation</b>                   |                                             |              |                      |                        |                              |                   |                    |                   |              |         |               |                                 |            |
| <b>Blombäck et al (1963)</b> <sup>93</sup> | Fibrinogen + alkaline phosphatase           | =            |                      | ↓                      |                              |                   |                    |                   |              |         |               |                                 |            |
| <b>Forsberg et al (1989)</b> <sup>87</sup> | Fibrinogen + alkaline phosphatase           |              |                      |                        |                              | ↑                 | ↑                  |                   |              |         |               |                                 |            |
| <b>Forsberg et al (1990)</b> <sup>88</sup> | Fibrinogen + alkaline phosphatase           |              |                      |                        |                              |                   |                    |                   |              |         |               | =                               |            |
| <b>Martin et al (1991)</b> <sup>89</sup>   | Fibrinogen + alkaline phosphatase           |              |                      |                        |                              | ↑                 | ↑                  |                   |              |         |               |                                 |            |
| <b>Martin et al (1992)</b> <sup>92</sup>   | Fibrinogen + alkaline phosphatase           |              |                      |                        |                              | ↑                 | ↑                  |                   |              |         |               |                                 |            |

**Supplemental Table VII. Effects of other modifications of fibrinogen**

| Author                                             | Method                                     | Clottability | Cleavage by thrombin | Rate of polymerization | Initiation of polymerization | Maximum turbidity | Diameter of fibers | Stiffness of clot | Permeability | Density | Cross-linking | Plasmin digestion of fibrinogen | Clot lysis |
|----------------------------------------------------|--------------------------------------------|--------------|----------------------|------------------------|------------------------------|-------------------|--------------------|-------------------|--------------|---------|---------------|---------------------------------|------------|
| <b>Homocysteinylation</b>                          |                                            |              |                      |                        |                              |                   |                    |                   |              |         |               |                                 |            |
| <b>Sauls et al (2003)</b> <sup>94</sup>            | Rabbit model of homocysteinuria            |              |                      | ↑                      |                              |                   | ↓                  |                   |              | ↑       |               |                                 | ↓          |
| <b>Lauricella et al (2006)</b> <sup>95</sup>       | Plasma + 500 μM hcys                       |              |                      | =                      |                              | ↑                 | ↑                  |                   |              | ↑       |               |                                 | ↓          |
| <b>Sauls et al (2006)</b> <sup>96</sup>            | Fibrinogen + 300 μM hcys                   | =            |                      |                        |                              |                   | ↓                  |                   |              | ↑       |               |                                 | ↓          |
|                                                    | Fibrinogen + 30 mM hcys                    | ↓            |                      |                        |                              |                   |                    |                   |              |         |               |                                 |            |
| <b>Marchi et al (2008)</b> <sup>97</sup>           | Plasma + 13, 19, 52 μM hcys                |              |                      | ↓                      | ↓                            | ↓                 | =                  |                   |              |         |               |                                 | ↓          |
|                                                    | Plasma + 251 μM hcys                       |              |                      | =                      | =                            | =                 |                    |                   |              |         | =             |                                 |            |
|                                                    | Fibrinogen + 408 μM hcys                   |              |                      | ↓                      | ↓                            | ↓                 |                    |                   |              |         | =             |                                 |            |
| <b>Rojas et al (2009)</b> <sup>98</sup>            | Plasma + 50-500 μM hcys                    |              |                      |                        |                              |                   |                    | ↑                 |              |         |               |                                 |            |
| <b>Sauls et al (2011)</b> <sup>99</sup>            | Fibrinogen + 300 μM hcys                   |              |                      |                        |                              |                   |                    |                   |              |         |               | ↓                               | ↓          |
| <b>Citrullination</b>                              |                                            |              |                      |                        |                              |                   |                    |                   |              |         |               |                                 |            |
| <b>Nakayama-Hamada et al (2008)</b> <sup>100</sup> | Fibrinogen + PAD4                          | ↓            | ↓                    | ↓                      |                              | ↓                 |                    |                   |              |         |               |                                 |            |
| <b>Okumura et al (2009)</b> <sup>101</sup>         | Fibrinogen + PAD2                          | ↓            | ↓                    | ↓                      |                              | ↓                 |                    |                   |              |         |               |                                 |            |
| <b>Damiana et al (2019)</b> <sup>102</sup>         | Fibrinogen + 0.7-20 μg/ml PAD2             |              |                      | ↓                      |                              | ↓                 | ↓                  |                   |              | ↓       |               |                                 | ↑ (ns)     |
| <b>Carbamylation</b>                               |                                            |              |                      |                        |                              |                   |                    |                   |              |         |               |                                 |            |
| <b>Binder et al (2017)</b> <sup>103</sup>          | Fibrinogen + 5 or 100 mM KOCN              |              | =                    | ↓                      | ↓                            | ↓                 | ↓                  |                   |              | ↑       | ↓             |                                 | ↓          |
| <b>Guanidinylation</b>                             |                                            |              |                      |                        |                              |                   |                    |                   |              |         |               |                                 |            |
| <b>Schuett et al (2017)</b> <sup>104</sup>         | Fibrinogen + 1 M o-methylisourea bisulfate |              |                      |                        |                              |                   | ↓                  |                   |              |         |               |                                 |            |
|                                                    | Plasma from patients on hemodialysis       |              |                      |                        |                              |                   | ↓                  |                   | ↓            |         |               |                                 |            |

Abbreviations: hcys, homocysteine; PAD, peptidyl arginine deiminase; KOCN, potassium cyanate.

## Supplemental References

1. Palos LA. Oxidation of the coagulation factors. *Nature*. 1949;164:926.
2. Sizer IW, Wagley PF. The action of tyrosinase on thrombin, fibrinogen, and fibrin. *J Biol Chem*. 1951;192:213-221.
3. Krugelis EJ, Sizer IW. The effects of tyrosinase on certain components of the blood clotting system. *Blood*. 1954;9:513-519.
4. Zieve PD, Solomon HM. Effect of hematoporphyrin and light on human fibrinogen. *Am J Physiol*. 1966;210:1391-1395.
5. Inada Y, Hessel B, Blomback B. Photooxidation of fibrinogen in the presence of methylene blue and its effect on polymerization. *Biochim Biophys Acta*. 1978;532:161-170.
6. Ishida Y, Takiuchi H, Matsushima A, Inada Y. Functional consequences of tryptophan modification in human fibrinogen. *Biochim Biophys Acta*. 1978;536:70-77.
7. Shacter E, Williams JA, Levine RL. Oxidative modification of fibrinogen inhibits thrombin-catalyzed clot formation. *Free Radic Biol Med*. 1995;18:815-821.
8. Upchurch Jr GR, Ramdev N, Walsh MT, Loscalzo J. Prothrombotic consequences of the oxidation of fibrinogen and their inhibition by aspirin. *J Thromb Trombolysis*. 1998;5:9-14.
9. Lupidi G, Angeletti M, Eleuteri AM, Tacconi L, Coletta M, Fioretti E. Peroxynitrite-mediated oxidation of fibrinogen inhibits clot formation. *FEBS Lett*. 1999;462:236-240.
10. Roitman EV, Azizova OA, Morozov Yu A, Aseichev AV. Effect of oxidized fibrinogens on blood coagulation. *Bull Exp Biol Med*. 2004;138:245-247.
11. Vadseth C, Souza JM, Thomson L, Seagraves A, Nagaswami C, Scheiner T, Torbet J, Vilaire G, Bennett JS, Murciano JC, Muzykantov V, Penn MS, Hazen SL, Weisel JW, Ischiropoulos H. Prothrombotic state induced by post-translational modification of fibrinogen by reactive nitrogen species. *J Biol Chem*. 2004;279:8820-8826.
12. Nowak P, Zbikowska HM, Ponczek M, Kolodziejczyk J, Wachowicz B. Different vulnerability of fibrinogen subunits to oxidative/nitrative modifications induced by peroxynitrite: Functional consequences. *Thromb Res*. 2007;121:163-174.
13. Andrades ME, Lorenzi R, Berger M, Guimarães JA, Moreira JCF, Dal-Pizzol F. Glycolaldehyde induces fibrinogen post-translational modification, delay in clotting and resistance to enzymatic digestion. *Chem -Biol Interact*. 2009;180:478-484.
14. Azizova OA, Piryazev AP, Aseychev AV, Shvachko AG. Oxidative modification of fibrinogen inhibits its transformation into fibrin under the effect of thrombin. *Bull Exp Biol Med*. 2009;147:201-203.
15. Piryazev AP, Aseichev AV, Azizova OA. Effect of oxidation-modified fibrinogen on the formation and lysis of fibrin clot in the plasma. *Bull Exp Biol Med*. 2009;148:881-883.
16. Rosenfeld MA, Leonova VB, Konstantinova ML, Razumovskii SD. Self-assembly of fibrin monomers and fibrinogen aggregation during ozone oxidation. *Biochemistry Mosc*. 2009;74:41-46.
17. Tetik S, Kaya K, Yardimci T. Effect of oxidized fibrinogen on hemostatic system: in vitro study. *Clin Appl Thromb Hemost*. 2011;17:259-263.
18. Weigandt KM, White N, Chung D, Ellingson E, Wang Y, Fu X, Pozzo DC. Fibrin clot structure and mechanics associated with specific oxidation of methionine residues in fibrinogen. *Biophys J*. 2012;103:2399-2407.
19. Xu YJ, Qiang M, Zhang JL, Liu Y, He RQ. Reactive carbonyl compounds (RCCs) cause aggregation and dysfunction of fibrinogen. *Protein Cell*. 2012;3:627-640.

20. Rosenfeld MA, Shchegolikhin AN, Bychkova AV, Leonova VB, Biryukova MI, Kostanova EA, Konstantinova ML. Ozone-induced oxidative modification of fibrinogen molecules. *Biochemistry Mosc.* 2013;78:1171-1179.
21. Stikarova J, Kotlin R, Riedel T, Suttner J, Pimkova K, Chrastinova L, Dyr JE. The effect of reagents mimicking oxidative stress on fibrinogen function. *ScientificWorldJournal.* 2013;2013:359621.
22. Becatti M, Marcucci R, Bruschi G, Taddei N, Bani D, Gori AM, Giusti B, Gensini GF, Abbate R, Fiorillo C. Oxidative modification of fibrinogen is associated with altered function and structure in the subacute phase of myocardial infarction. *Arterioscler Thromb Vasc Biol.* 2014;34:1355-1361.
23. Rosenfeld MA, Shchegolikhin AN, Bychkova AV, Leonova VB, Biryukova MI, Kostanova EA. Ozone-induced oxidative modification of fibrinogen: Role of the D regions. *Free Radic Biol Med.* 2014;77:106-120.
24. Torbitz VD, Bochi GV, de Carvalho JA, de Almeida Vaucher R, da Silva JE, Moresco RN. In vitro oxidation of fibrinogen promotes functional alterations and formation of advanced oxidation protein products, an inflammation mediator. *Inflammation.* 2015;38:1201-1206.
25. Harutyunyan HA. Prothrombin and fibrinogen carbonylation: How that can affect the blood clotting. *Redox Rep.* 2017;22:160-165.
26. Wang L, Cui C, Li R, Xu S, Li H, Li L, Liu J. Study on the oxidation of fibrinogen using Fe<sub>3</sub>O<sub>4</sub> magnetic nanoparticles and its influence to the formation of fibrin. *J Inorg Biochem.* 2018;189:58-68.
27. Yurina LV, Vasilyeva AD, Bugrova AE, Indeykina MI, Kononikhin AS, Nikolaev EN, Rosenfeld MA. Hypochlorite-Induced Oxidative Modification of Fibrinogen. *Dokl Biochem Biophys.* 2019;484:37-41.
28. Paton LN, Mocatta TJ, Richards AM, Winterbourn CC. Increased thrombin-induced polymerization of fibrinogen associated with high protein carbonyl levels in plasma from patients post myocardial infarction. *Free Radic Biol Med.* 2010;48:223-229.
29. Becatti M, Emmi G, Silvestri E, Bruschi G, Ciucciarelli L, Squatrito D, Vaglio A, Taddei N, Abbate R, Emmi L, Goldoni M, Fiorillo C, Prisco D. Neutrophil Activation Promotes Fibrinogen Oxidation and Thrombus Formation in Behçet Disease. *Circulation.* 2016;133:302-311.
30. Hugenholtz GCG, Macrae F, Adelmeijer J, Dulfer S, Porte RJ, Lisman T, Ariëns RAS. Procoagulant changes in fibrin clot structure in patients with cirrhosis are associated with oxidative modifications of fibrinogen. *J Thromb Haemost.* 2016;14:1054-1066.
31. White NJ, Wang Y, Fu X, Cardenas JC, Martin EJ, Brophy DF, Wade CE, Wang X, St. John AE, Lim EB, Stern SA, Ward KR, López JA, Chung D. Post-translational oxidative modification of fibrinogen is associated with coagulopathy after traumatic injury. *Free Radic Biol Med.* 2016;96:181-189.
32. Bijak M, Nowak P, Borowiecka M, Ponczek MB, Zbikowska HM, Wachowicz B. Protective effects of (-)-epicatechin against nitrative modifications of fibrinogen. *Thromb Res.* 2012;130:e123-e128.
33. Ding Y, Luo Y, Fu J. Effects of Mn (II) on peroxy-nitrite nitrifying fibrinogen. *Bio-Med Mater Eng.* 2014;24:901-907.
34. Bijak M, Saluk J, Antosik A, Ponczek MB, Zbikowska HM, Borowiecka M, Nowak P. Aronia melanocarpa as a protector against nitration of fibrinogen. *Int J Biol Macromol.* 2013;55:264-268.
35. Gole MD, Souza JM, Choi I, Hertkorn C, Malcolm S, Foust RF, 3rd, Finkel B, Lankester PN, Ischiropoulos H. Plasma proteins modified by tyrosine nitration in acute respiratory distress syndrome. *Am J Physiol Lung Cell Mol Physiol.* 2000;278:L961-967.



36. Helms CC, Kapadia S, Gilmore AC, Lu Z, Basu S, Kim-Shapiro DB. Exposure of fibrinogen and thrombin to nitric oxide donor ProliNONOate affects fibrin clot properties. *Blood Coagul Fibrinolysis*. 2017;28:356-364.
37. Ponczek MB, Nowak P, Wachowicz B. The effects of nitronium ion on nitration, carbonylation and coagulation of human fibrinogen. *Gen Physiol Biophys*. 2008;27:55-58.
38. Parastatidis I, Thomson L, Fries DM, Moore RE, Tohyama J, Fu X, Hazen SL, Heijnen HFG, Dennehy MK, Liebler DC, Rader DJ, Ischiropoulos H. Increased protein nitration burden in the atherosclerotic lesions and plasma of apolipoprotein A-I-deficient mice. *Circ Res*. 2007;101:368-376.
39. Parastatidis I, Thomson L, Burke A, Chernysh I, Nagaswami C, Visser J, Stamer S, Liebler DC, Koliakos G, Heijnen HFG, FitzGerald GA, Weisel JW, Ischiropoulos H. Fibrinogen  $\beta$ -chain tyrosine nitration is a prothrombotic risk factor. *J Biol Chem*. 2008;283:33846-33853.
40. Heffron SP, Parastatidis I, Cuchel M, Wolfe ML, Tadesse MG, Mohler IER, Ischiropoulos H, Rader DJ, Reilly MP. Inflammation induces fibrinogen nitration in experimental human endotoxemia. *Free Radic Biol Med*. 2009;47:1140-1146.
41. Gligorijević N, Zámorová Križáková M, Penezić A, Katrlík J, Nedić O. Structural and functional changes of fibrinogen due to aging. *Int J Biol Macromol*. 2018;108:1028-1034.
42. Gilman PB, Keane P, Martinez J. The role of the carbohydrate moiety in the biologic properties of fibrinogen. *J BIOL CHEM*. 1984;259:3248-3253.
43. Langer BG, Weisel JW, Dinauer PA, Nagaswami C, Bell WR. Deglycosylation of fibrinogen accelerates polymerization and increases lateral aggregation of fibrin fibers. *J Biol Chem*. 1988;263:15056-15063.
44. Galnick HR, Givelber H, Abrams E. Dysfibrinogenemia associated with hepatoma. Increased carbohydrate content of the fibrinogen molecule. *N Engl J Med*. 1978;299:221-226.
45. Martinez J, Palascak JE, Kwasniak D. Abnormal sialic acid content of the dysfibrinogenemia associated with liver disease. *J Clin Invest*. 1978;61:535-538.
46. Martinez J, MacDonald KA, Palascak JE. The role of sialic acid in the dysfibrinogenemia associated with liver disease: distribution of sialic acid on the constituent chains. *Blood*. 1983;61:1196-1202.
47. Maghzal GJ, Brennan SO, George PM. The sialic acid content of fibrinogen decreases during pregnancy and increases in response to fibrate therapy. *Thromb Res*. 2005;115:293-299.
48. Chandrasekhar N, Warren L, Osbahr AJ, Laki K. Role of sialic acid in fibrinogen. *Biochim Biophys Acta*. 1962;63:337-339.
49. Laki K, Mester L. The role of the carbohydrate moiety in bovine fibrinogen. *Biochim Biophys Acta*. 1962;57:152-154.
50. Gentry PA, Alexander B. Human fibrinogen and asialo-fibrinogen: a comparison of coagulation parameters. *Arch Biochem Biophys*. 1976;173:50-57.
51. Martinez J, Palascak J, Peters C. Functional and metabolic properties of human asialofibrinogen. *J Lab Clin Med*. 1977;89:367-377.
52. Diaz-Maurino T, Albert A. Interaction of fibrinogen and asialofibrinogen with concanavalin A and clotting properties of the complexes. *Biochim Biophys Acta*. 1981;677:381-389.
53. Diaz-Maurino T, Castro C, Albert A. Desialylation of fibrinogen with neuraminidase. Kinetic and clotting studies. *Thromb Res*. 1982;27:397-403.
54. Dang CV, Shin CK, Bell WR, Nagaswami C, Weisel JW. Fibrinogen sialic acid residues are low affinity calcium-binding sites that influence fibrin assembly. *J Biol Chem*. 1989;264:15104-15108.
55. Okude M, Yamanaka A, Morimoto Y, Akihama S. Sialic acid in fibrinogen: effects of sialic acid on fibrinogen-fibrin conversion by thrombin and properties of asialofibrin clot. *Biol Pharm Bull*. 1993;16:448-452.

56. El-Fasakhany FM, Ichihara-Tanaka K, Uchimura K, Muramatsu T. N-Acetylglucosamine-6-O-sulfotransferase-1: Production in the baculovirus system and its applications to the synthesis of a sulfated oligosaccharide and to the modification of oligosaccharides in fibrinogen. *J Biochem.* 2003;133:287-293.
57. Norton DG, Fan NK, Goudie MJ, Handa H, Platt MO, Averett RD. Computational imaging analysis of glycosylated fibrin gels reveals aggregated and anisotropic structures. *J Biomed Mater Res Part A.* 2017;105:2191-2198.
58. Hood JE, Yesudasan S, Averett RD. Glucose Concentration Affects Fibrin Clot Structure and Morphology as Evidenced by Fluorescence Imaging and Molecular Simulations. *Clin Appl Thromb Hemost.* 2018.
59. Dunn EJ, Ariens RA, Grant PJ. The influence of type 2 diabetes on fibrin structure and function. *Diabetologia.* 2005;48:1198-1206.
60. Ney KA, Pasqua JJ, Colley KJ, Guthrow CE, Pizzo SV. In vitro preparation of nonenzymatically glycosylated human transferrin, alpha 2-macroglobulin, and fibrinogen with preservation of function. *Diabetes.* 1985;34:462-470.
61. Kanska U, Omar MS, Budzynska R, Nevozhay D, Jagiello M, Opolski A, Boratynski J. Antileukemic activity of glycosylated fibrinogen-methotrexate conjugates. *Anticancer Res.* 2005;25:2229-2234.
62. McVerry BA, Thorpe S, Joe F. Non-enzymatic glycosylation of fibrinogen. *HAEMOSTASIS.* 1981;10:261-270.
63. Krantz S, Lober M, Thiele M, Teuscher E. Properties of in vitro nonenzymatically glycosylated plasma fibrinogens. *Exp Clin Endocrinol.* 1987;90:37-45.
64. Mirmiranpour H, Bathaie SZ, Khaghani S, Nakhjavani M, Kebriaeezadeh A. Investigation of the mechanism(s) involved in decreasing increased fibrinogen activity in hyperglycemic conditions using L-lysine supplementation. *Thromb Res.* 2012;130:e13-e19.
65. Mirshahi M, Soria J, Soria C, Bertrand O, Mirshahi M, Basdevant A. Glycosylation of human fibrinogen and fibrin in vitro. Its consequences on the properties of fibrin(ogen). *Thromb Res.* 1987;48:279-289.
66. Brownlee M, Vlassara H, Cerami A. Nonenzymatic glycosylation reduces the susceptibility of fibrin to degradation by plasmin. *Diabetes.* 1983;32:680-684.
67. Murakami T, Egawa H, Komiyama Y, Masuda M, Murata K. Increased accumulation of nonenzymatically glycosylated fibrinogen in the renal cortex in rats. *THROMB RES.* 1990;58:23-33.
68. Robinson PW, Jury DR, Langdon AG. The relative clotting activity of glycosylated and non-glycosylated forms of fibrinogen. *ANN CLIN BIOCHEM.* 1991;28:618-619.
69. Lutjens A, Jonkhoff-Slok TW, Sandkuijl C, Van der Veen EA, Van der Meer J. Polymerisation and crosslinking of fibrin monomers in diabetes mellitus. *DIABETOLOGIA.* 1988;31:825-830.
70. Pieters M, Covic N, Van Der Westhuizen FH, Nagaswami C, Baras Y, Loots DT, Jerling JC, Elgar D, Edmondson KS, Van Zyl DG, Rheeder P, Weisel JW. Glycaemic control improves fibrin network characteristics in type 2 diabetes - A purified fibrinogen model. *Thromb Haemost.* 2008;99:691-700.
71. Pieters M, Covic N, Loots DT, van der Westhuizen FH, van Zyl DG, Rheeder P, Jerling JC, Weisel JW. The effect of glycaemic control on fibrin network structure of type 2 diabetic subjects. *Thromb Haemost.* 2006;96:623-629.
72. Li W, Sigley J, Pieters M, Helms CC, Nagaswami C, Weisel JW, Guthold M. Fibrin Fiber Stiffness Is Strongly Affected by Fiber Diameter, but Not by Fibrinogen Glycation. *Biophys J.* 2016;110:1400-1410.
73. Caspary EA. Studies on the acetylation of human fibrinogen. *Biochem J.* 1956;62:507-512.
74. Phillips HM, York JL. Bovine fibrinogen. II. Effects of tyrosine modification on fibrin monomer aggregation. *Biochemistry.* 1973;12:3642-3647.

75. Wegrzynowicz Z, Kloczewiak M, Kopec M. Bovine fibrinogen modified with 3H acetic anhydride (3H AcOAc). *J LAB CLIN MED*. 1975;86:360-368.
76. Bjornsson TD, Schneider DE, Berger Jr H. Aspirin acetylates fibrinogen and enhances fibrinolysis. Fibrinolytic effect is independent of changes in plasminogen activator levels. *J PHARMACOL EXP THER*. 1989;250:154-161.
77. He S, Blomback M, Yoo G, Sinha R, Henschen-Edman AH. Modified clotting properties of fibrinogen in the presence of acetylsalicylic acid in a purified system. *Ann N Y Acad Sci*. 2001;936:531-535.
78. Ajjan RA, Standeven KF, Khanbhai M, Phoenix F, Gersh KC, Weisel JW, Kearney MT, Ariens RA, Grant PJ. Effects of aspirin on clot structure and fibrinolysis using a novel in vitro cellular system. *Arterioscler Thromb Vasc Biol*. 2009;29:712-717.
79. He S, Bark N, Wang H, Svensson J, Blombäck M. Effects of acetylsalicylic acid on increase of fibrin network porosity and the consequent upregulation of fibrinolysis. *J Cardiovasc Pharmacol*. 2009;53:24-29.
80. Williams S, Fatah K, Ivert T, Blomback M. The effect of acetylsalicylic acid on fibrin gel lysis by tissue plasminogen activator. *Blood Coagul Fibrinolysis*. 1995;6:718-725.
81. Fatah K, Beving H, Albage A, Ivert T, Blomback M. Acetylsalicylic acid may protect the patient by increasing fibrin gel porosity. Is withdrawing of treatment harmful to the patient? *EUR HEART J*. 1996;17:1362-1366.
82. Jörneskog G, Fatah K, Blombäck M. Fibrin gel structure in diabetic patients before and during treatment with acetylsalicylic acid: a pilot study. *Fibrinolysis and Proteolysis*. 1998;12:360-365.
83. Williams S, Fatah K, Hjemdahl P, Blomback M. Better increase in fibrin gel porosity by low dose than intermediate dose acetylsalicylic acid. *Eur Heart J*. 1998;19:1666-1672.
84. Antovic A, Perneby C, Ekman GJ, Wallen HN, Hjemdahl P, Blombäck M, He S. Marked increase of fibrin gel permeability with very low dose ASA treatment. *Thromb Res*. 2005;116:509-517.
85. Hanna LS, Scheraga HA, Francis CW, Marder VJ. Comparison of structures of various human fibrinogens and a derivative thereof by a study of the kinetics of release of fibrinopeptides. *Biochemistry*. 1984;23:4681-4687.
86. Heldin P, Hessel B, Humble E, Blomback B, Engstrom L. Effect of phosphorylation in vitro of human fibrinogen with protein kinase C on thrombin-induced gelation. *Thromb Res*. 1987;47:93-99.
87. Forsberg PO. Dephosphorylation of human fibrinogen, previously phosphorylated in vitro by protein kinase C, by whole blood or intestinal alkaline phosphatase. Effects on thrombin-induced gelation of in vitro dephosphorylated human fibrinogen. *THROMB RES*. 1989;53:1-9.
88. Forsberg PO, Martin SC. Plasmin digestion of human fibrinogen previously phosphorylated by protein kinase C or dephosphorylated by alkaline phosphatase in vitro. *THROMB RES*. 1990;58:119-127.
89. Martin SC, Forsberg PO, Eriksson SD. The effects of in vitro phosphorylation and dephosphorylation on the thrombin-induced gelation and plasmin degradation of fibrinogen. *THROMB RES*. 1991;61:243-252.
90. Heldin P. Phosphorylation in vitro of human fibrinogen with casein kinase TS and characterization of phosphorylated sites. *Arch Biochem Biophys*. 1987;257:269-275.
91. Suk K, Lee JY, Kim SH. Synergistic stimulation of fibrinogen gelation by casein kinase II and polycationic compounds. *Biochem Mol Biol Int*. 1997;42:487-495.
92. Martin SC, Ekman P, Forsberg PO, Ersmark H. Increased phosphate content of fibrinogen in vivo correlates with alteration in fibrinogen behaviour. *THROMB RES*. 1992;68:467-473.
93. Blomback B, Blomback M, Searle J. On the occurrence of phosphorus in fibrinogen. *Biochim Biophys Acta*. 1963;74:148-151.

94. Sauls DL, Wolberg AS, Hoffman M. Elevated plasma homocysteine leads to alterations in fibrin clot structure and stability: implications for the mechanism of thrombosis in hyperhomocysteinemia. *J Thromb Haemost.* 2003;1:300-306.
95. Lauricella AM, Quintana I, Castanon M, Sasseti B, Kordich L. Influence of homocysteine on fibrin network lysis. *Blood Coagul Fibrinolysis.* 2006;17:181-186.
96. Sauls DL, Lockhart E, Warren ME, Lenkowski A, Wilhelm SE, Hoffman M. Modification of fibrinogen by homocysteine thiolactone increases resistance to fibrinolysis: a potential mechanism of the thrombotic tendency in hyperhomocysteinemia. *Biochemistry.* 2006;45:2480-2487.
97. Marchi R, Carvajal Z, Weisel JW. Comparison of the effect of different homocysteine concentrations on clot formation using human plasma and purified fibrinogen. *Thromb Haemost.* 2008;99:451-452.
98. Rojas AM, Kordich L, Lauricella AM. Homocysteine modifies fibrin clot deformability: another possible explanation of harm. *Biorheology.* 2009;46:379-387.
99. Sauls DL, Warren M, Hoffman M. Homocysteinylated fibrinogen forms disulfide-linked complexes with albumin. *Thromb Res.* 2011;127:576-581.
100. Nakayama-Hamada M, Suzuki A, Furukawa H, Yamada R, Yamamoto K. Citrullinated fibrinogen inhibits thrombin-catalysed fibrin polymerization. *J Biochem.* 2008;144:393-398.
101. Okumura N, Haneishi A, Terasawa F. Citrullinated fibrinogen shows defects in FPA and FPB release and fibrin polymerization catalyzed by thrombin. *Clin Chim Acta.* 2009;401:119-123.
102. Damiana T, Damgaard D, Sidelmann JJ, Nielsen CH, de Maat MPM, Munster AB, Palarasah Y. Citrullination of fibrinogen by peptidylarginine deiminase 2 impairs fibrin clot structure. *Clin Chim Acta.* 2019.
103. Binder V, Bergum B, Jaisson S, Gillery P, Scavenius C, Spriet E, Nyhaug AK, Roberts HM, Chapple ILC, Hellvard A, Delaleu N, Mydel P. Impact of fibrinogen carbamylation on fibrin clot formation and stability. *Thromb Haemost.* 2017;117:899-910.
104. Schuett K, Savvaidis A, Maxeiner S, Lysaja K, Jankowski V, Schirmer SH, Dimkovic N, Boor P, Kaesler N, Dekker FW, Floege J, Marx N, Schlieper G. Clot structure: A potent mortality risk factor in patients on hemodialysis. *J Am Soc Nephrol.* 2017;28:1622-1630.
